# Supplementary material for: Flexible and Wearable PDMS-Based Triboelectric Nanogenerator for Self-Powered Tactile Sensing
Source: MDPI journal article supplement (doi:10.3390/nano9091304), 2019-09-12
Supplement: s1 [file s1]

# Flexible and Wearable PDMS-Based Triboelectric Nanogenerator for Self-Powered Tactile Sensing

Jie Wang <sup>1,2,\*</sup>, Shuo Qian <sup>3,†</sup>, Junbin Yu <sup>3</sup>, Qiang Zhang <sup>1</sup>, Zhongyun Yuan <sup>1</sup>, Shengbo Sang <sup>1</sup>, Xiaohong Zhou <sup>4</sup> and Lining Sun <sup>2</sup>

<sup>1</sup> College of Information and Computer, Taiyuan University of Technology, Taiyuan 030024, China

<sup>2</sup> Research Institute of Advanced Manufacturing Technology, Soochow University, Suzhou 215006, China

<sup>3</sup> School of Instrument and Electronics, North University of China, Taiyuan 030051, China

<sup>4</sup> School of Optoelectronic Science and Engineering, Soochow University, Suzhou 215006, China

\* Correspondence: wangjie@tyut.edu.cn

† These authors contributed equally to this work.

Received: 10 August 2019; Accepted: 9 September 2019; Published: date

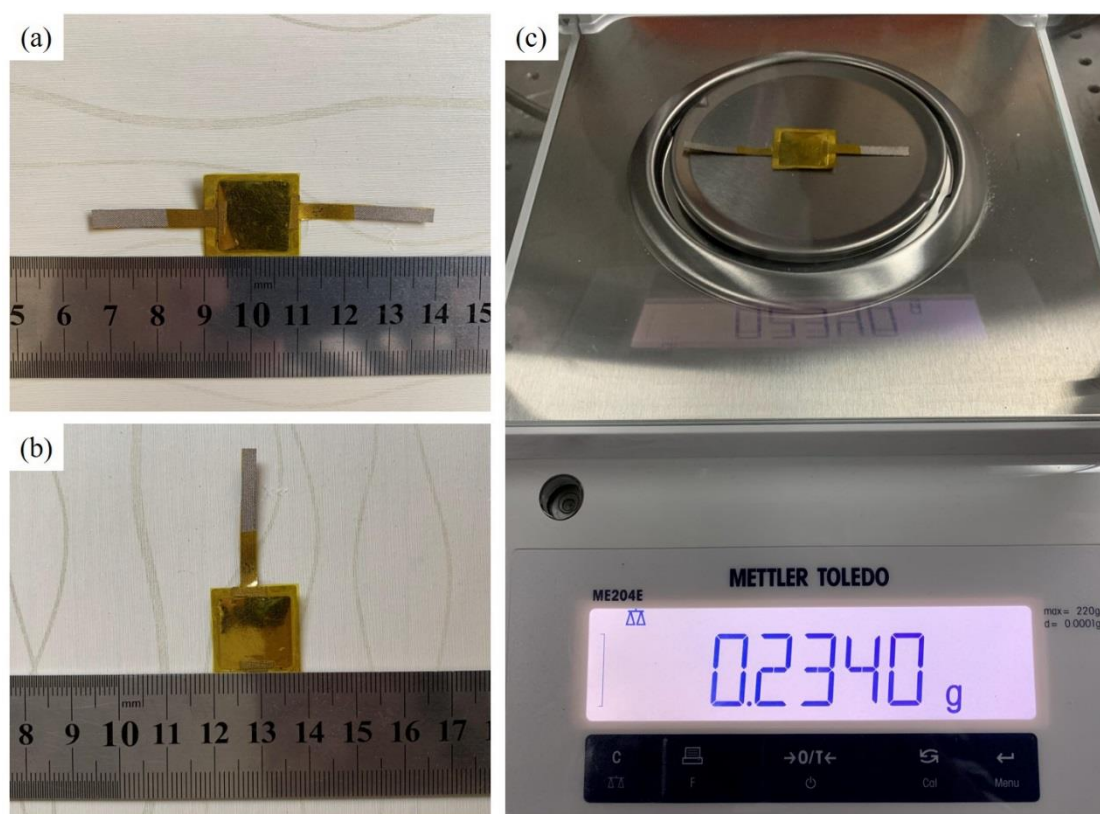

**Figure S1.** (a, b) The size of the developed sensor; (c) The weight of the developed sensor.

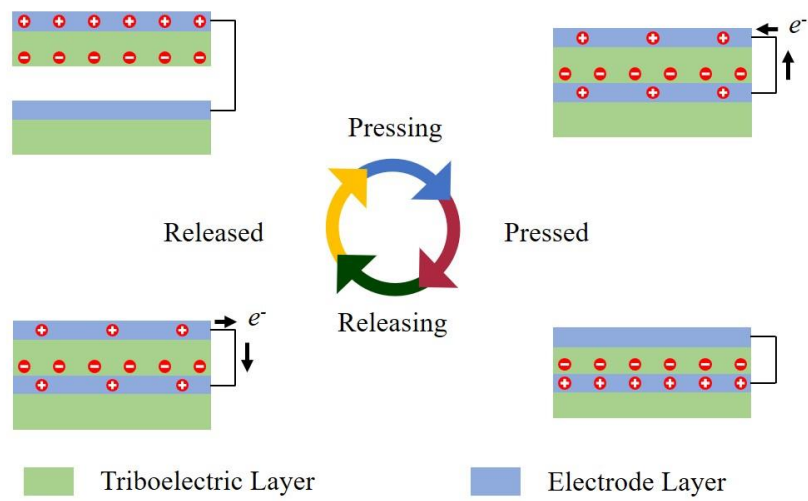

**Figure S2.** The working mechanism of TENG-base sensor.

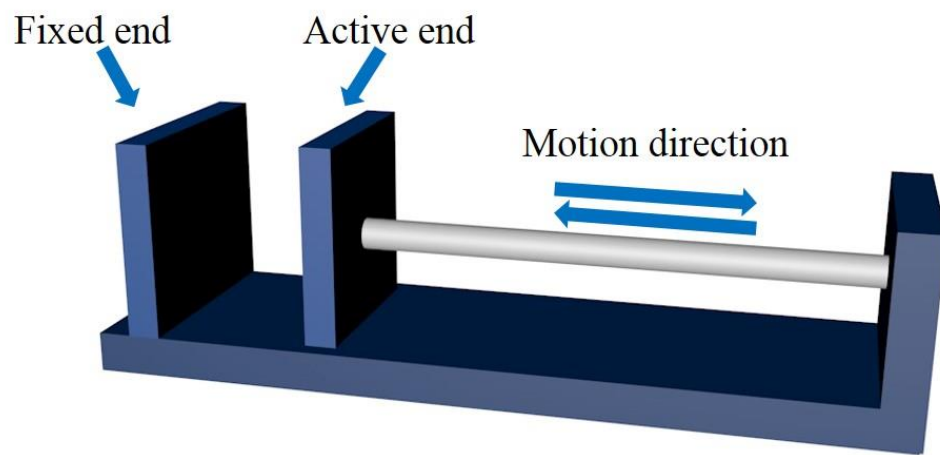

**Figure S3.** The schematic diagram of the charging curves test and lighting test.

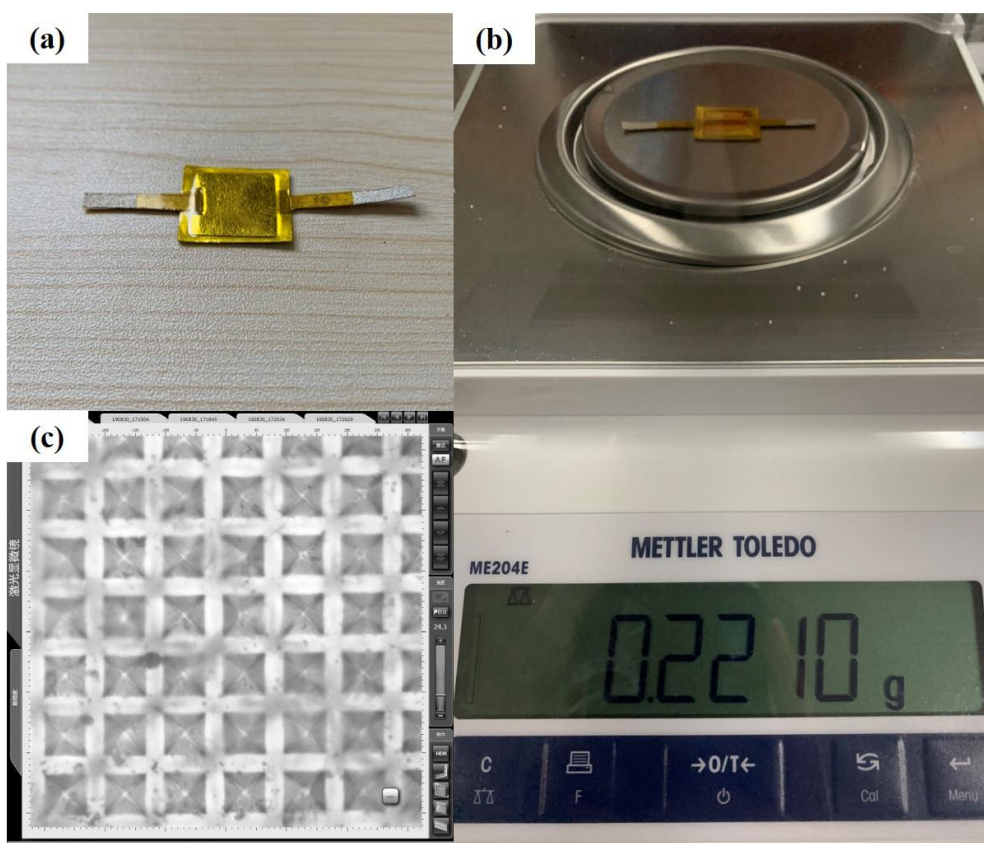

**Figure S4.** (a) The image of the developed sensor; (b) The weight of the developed sensor; (c) The image of micro-structure after the stability test (tested by the confocal microscopy).

**Table S1.** The triboelectric series.

| Positive                                                                            | Polyformaldehyde 1.3-1.4       | (Continued)                                            |                                                                                       |
|-------------------------------------------------------------------------------------|--------------------------------|--------------------------------------------------------|---------------------------------------------------------------------------------------|
|  | Etycellulose                   | Polyester                                              |  |
|                                                                                     | Polyamide 11                   | Polyisobutylene                                        |                                                                                       |
|                                                                                     | Polyamide 66                   | Polyurethane flexible sponge                           |                                                                                       |
|                                                                                     | Melanime formol                | Polyethylene terephthalate (PET)                       |                                                                                       |
|                                                                                     | Wool, knitted                  | Polyethyl butyral                                      |                                                                                       |
|                                                                                     | Silk woven                     | Polychlorobutadiene                                    |                                                                                       |
|                                                                                     | aluminum                       | Natural rubber                                         |                                                                                       |
|                                                                                     | Paper                          | Polyacrionitrite                                       |                                                                                       |
|                                                                                     | Cotton, woven                  | Acrylonitrile vinyl chloride                           |                                                                                       |
|                                                                                     | Steel                          | Polybispheol carbonate                                 |                                                                                       |
|                                                                                     | Wood                           | Polychloroether                                        |                                                                                       |
|                                                                                     | Hard Rubber                    | Polyvinylidene chioride                                |                                                                                       |
|                                                                                     | Nickel, copper, mercury        | Polystyrene                                            |                                                                                       |
|                                                                                     | Sulfur                         | Polyethylene                                           |                                                                                       |
|                                                                                     | Brass, silver                  | Polypropylene                                          |                                                                                       |
|                                                                                     | Acetate, Rayon                 | Polyimide (Kapton)                                     |                                                                                       |
|                                                                                     | Polymethyl Methacrylate (PMMA) | Polyvinvi chloride (PVC)                               |                                                                                       |
|                                                                                     | Polyvinyl alcohol              | Polyvinvi chloride (PVDF), polydimethylsiloxane (PDMS) |                                                                                       |
|                                                                                     | (continued)                    | Polytetrafluoroethylene (PTFE)                         | Negative                                                                              |
